# Supplementary material for: An NH2-modified {EuIII2}–organic framework for the efficient chemical fixation of CO2 and highly selective sensing of 2,4,6-trinitrophenol
Source: Royal Society of Chemistry journal article supplement (doi:10.1039/d1qi00762a), 2021-01-01
Supplement: d1qi00762a1.pdf [file d1qi00762a1.pdf]

## *Supporting Information*

# **NH<sub>2</sub>-Modified {Eu<sup>III</sup><sub>2</sub>}-Organic Framework for Efficient Chemical Fixation of CO<sub>2</sub> and Highly Selective Sensing of 2,4,6-Trinitrophenol**

5

Hongtai Chen,<sup>a</sup> Zhengguo Zhang,<sup>a</sup> Tuoping Hu,<sup>a</sup> and Xiutang Zhang<sup>a\*</sup>

<sup>a</sup>Department of Chemistry, College of Science, North University of China, Taiyuan 030051, People's Republic of China. E-mail: [xiutangzhang@163.com](mailto:xiutangzhang@163.com)

## Content

Table S1. Crystallographic data and refinement parameters of NUC-41.

Table S2. Selected bond lengths and angles of NUC-41.

Table S3. Comparison of the catalytic performance of NUC-41a catalyst with selected previously reported MOFs.

5 Scheme S1. The  $^1\text{H}$  NMR of designed  $\text{H}_5\text{DDAC}$  ligand.

Figure S1. The coordination mode of DDAC ligand with type I (a) and type II (b); the ytterbium-hydroxide structure (b); the one-dimensional  $[\{\text{Eu}(2)_2\}(\text{HCO}_2)]_n$  chain (c).

Figure S2. TGA Curve of as-synthesized (black) and activated (red) sample of NUC-41.

Figure S3. PXRD pattern of as-synthesized NUC-41 sample.

10 Figure S4. PXRD pattern of NUC-41 after activation.

$Q_{st}$  Calculation.

Figure S5.  $\text{N}_2$  absorption and desorption isotherms of NUC-41a at 77 K (Insert: the pore size distribution).

Figure S6. The  $\text{CO}_2$  sorption performance of NUC-41a at 273K and 298K.

Figure S7.  $\text{CO}_2$  adsorption heat calculated by the virial equation of NUC-41a.

15 Yield Calculation Based on the GC-MS Analysis

Figure S8-S13. The  $^1\text{H}$  NMR spectrums of cycloaddition reaction products.

Figure S14. The recycled catalytic cycloaddition reaction.

Figure S15. The hot filtration experiment of cycloaddition reaction catalysed by NUC-41a.

Figure S16. The PXRD pattern of NUC-41a after recycled cycloaddition reaction.

20 Figure S17. The proposed reaction mechanism for the chemical fixation of  $\text{CO}_2$  in presence of synergistic catalysis.

Figure S18. The luminescence spectra of NUC-41.

Figure S19. The luminescence lifetime of NUC-41.

Figure S20. The phosphorescence luminescence of Gd-MOF at 77K.

Figure S21. Nitrobenzene-added emission intensity of NUC-41 in the presence of various solvents.

25 Figure S22. The plot of  $I_0/I$  versus the TNP concentration from 0-0.15 mM.

Figure S23. The recycled luminescence sensing experiment of NUC-41 toward TNP.

Figure S24. The PXRD pattern of NUC-41 after recycled luminescence sensing of TNP.

**Table S1. Crystallographic data and refinement parameters of NUC-41.**

| Complex                                  | NUC-41                                                                         |
|------------------------------------------|--------------------------------------------------------------------------------|
| Formula                                  | C <sub>70</sub> H <sub>32</sub> Eu <sub>4</sub> N <sub>3</sub> O <sub>35</sub> |
| Mr                                       | 2082.82                                                                        |
| Crystal system                           | orthorhombic                                                                   |
| Space group                              | <i>Pnma</i>                                                                    |
| a (Å)                                    | 32.6303(18)                                                                    |
| b (Å)                                    | 18.587(3)                                                                      |
| c (Å)                                    | 16.648(5)                                                                      |
| α (°)                                    | 90                                                                             |
| β (°)                                    | 90                                                                             |
| γ (°)                                    | 90                                                                             |
| V(Å <sup>3</sup> )                       | 10097(3)                                                                       |
| Z                                        | 4                                                                              |
| Dcalcd(g·cm <sup>-3</sup> )              | 1.370                                                                          |
| μ(mm <sup>-1</sup> )                     | 2.520                                                                          |
| GOF                                      | 0.989                                                                          |
| R <sub>1</sub> [I > 2σ(I)] <sup>a</sup>  | 0.0584                                                                         |
| wR <sub>2</sub> [I > 2σ(I)] <sup>b</sup> | 0.1209                                                                         |
| R <sub>1</sub> <sup>a</sup> (all data)   | 0.1094                                                                         |
| wR <sub>2</sub> <sup>b</sup> (all data)  | 0.1450                                                                         |
| R <sub>int</sub>                         | 0.1597                                                                         |

<sup>a</sup>  $R_1 = \sum ||F_o| - |F_c|| / \sum |F_o|$ . <sup>b</sup>  $wR_2 = [\sum w(|F_o|^2 - |F_c|^2)^2 / \sum w(F_o)^2]^{1/2}$

**Table S2. Selected bond lengths and angles of NUC-41.**

|                                                                                                                                                                                            |          |                |          |                 |          |
|--------------------------------------------------------------------------------------------------------------------------------------------------------------------------------------------|----------|----------------|----------|-----------------|----------|
| Eu1-O3#1                                                                                                                                                                                   | 2.289(7) | Eu1-O5         | 2.276(7) | Eu1-O8#2        | 2.491(6) |
| Eu1-O9#2                                                                                                                                                                                   | 2.470(7) | Eu1-O10        | 2.295(7) | Eu1-O13#3       | 2.493(6) |
| Eu1-O14#3                                                                                                                                                                                  | 2.384(7) | Eu1-O15        | 2.313(7) |                 |          |
| Eu2-O2#4                                                                                                                                                                                   | 2.382(7) | Eu2-O6#5       | 2.501(7) | Eu2-O7#5        | 2.401(6) |
| Eu2-O11#6                                                                                                                                                                                  | 2.312(7) | Eu2-O12        | 2.243(8) | Eu2-O16         | 2.279(9) |
| Eu2-O1W                                                                                                                                                                                    | 2.468(9) | Eu2-O14        | 2.490(6) |                 |          |
| O3#1-Eu1-O8#2                                                                                                                                                                              | 127.5(3) | O3#1-Eu1-O9#2  | 75.9(2)  | O3#1-Eu1-O10    | 154.1(2) |
| O3#1-Eu1-O13#3                                                                                                                                                                             | 80.8(2)  | O3#1-Eu1-O14#3 | 87.7(3)  | O3#1-Eu1-O15    | 106.0(3) |
| O5-Eu1-O3#1                                                                                                                                                                                | 75.8(3)  | O5-Eu1-O8#2    | 151.4(2) | O5-Eu1-O9#2     | 139.6(3) |
| O5-Eu1-O10                                                                                                                                                                                 | 89.5(3)  | O5-Eu1-O13#3   | 75.4(2)  | O5-Eu1-O14#3    | 128.7(2) |
| O5-Eu1-O15                                                                                                                                                                                 | 80.6(2)  | O8#2-Eu1-O13#3 | 120.4(2) | O9#2-Eu1-O8#2   | 52.6(2)  |
| O9#2-Eu1-O13#3                                                                                                                                                                             | 127.0(2) | O10-Eu1-O8#2   | 73.9(2)  | O10-Eu1-O9#2    | 126.4(2) |
| O10-Eu1-O13#3                                                                                                                                                                              | 74.9(2)  | O10-Eu1-O14#3  | 85.0(3)  | O10-Eu1-O15     | 92.1(2)  |
| O14#3-Eu1-O8#2                                                                                                                                                                             | 74.0(2)  | O14#3-Eu1-O9#2 | 78.1(2)  | O14#3-Eu1-O13#3 | 53.9(2)  |
| O15-Eu1-O8#2                                                                                                                                                                               | 77.0(2)  | O15-Eu1-O9#2   | 80.2(2)  | O15-Eu1-O13#3   | 152.6(2) |
| O15-Eu1-O14#3                                                                                                                                                                              | 150.5(2) |                |          |                 |          |
| O14-Eu2-O6#5                                                                                                                                                                               | 129.8(2) | O2#4-Eu2-O14   | 54.5(2)  | O2#4-Eu2-O65    | 77.8(3)  |
| O2#4-Eu2-O75                                                                                                                                                                               | 78.5(2)  | O2#4-Eu2-O1W   | 131.9(3) | O75-Eu2-O14     | 120.6(2) |
| O7#5-Eu2-O6#5                                                                                                                                                                              | 53.8(2)  | O7#5-Eu2-O1W   | 147.8(3) | O11#6-Eu2-O14   | 154.9(3) |
| O11#6-Eu2-O2#4                                                                                                                                                                             | 150.4(3) | O11#6-Eu2-O6#5 | 73.4(3)  | O11#6-Eu2-O7#5  | 79.3(3)  |
| O11#6-Eu2-O1W                                                                                                                                                                              | 74.8(3)  | O12-Eu2-O14    | 81.5(3)  | O12-Eu2-O2#4    | 82.9(3)  |
| O12-Eu2-O6#5                                                                                                                                                                               | 77.7(3)  | O12-Eu2-O7#5   | 130.6(3) | O12-Eu2-O11#6   | 97.1(3)  |
| O12-Eu2-O16                                                                                                                                                                                | 148.6(3) | O12-Eu2-O1W    | 72.2(3)  | O16-Eu2-O14     | 82.3(3)  |
| O16-Eu2-O2#4                                                                                                                                                                               | 108.8(3) | O16-Eu2-O6#5   | 132.6(3) | O16-Eu2-O7#5    | 80.8(3)  |
| O16-Eu2-O11#6                                                                                                                                                                              | 86.6(3)  | O16-Eu2-O1W    | 78.8(3)  | O1W-Eu2-O14     | 81.0(3)  |
| O1W-Eu2-O6#5                                                                                                                                                                               | 132.5(3) |                |          |                 |          |
| Symmetry transformations used to generate equivalent atoms: #1: 1-X,1/2+Y,1-Z; #2: 3/2-X,1/2+Y,1/2+Z; #3: 3/2-X,1-Y,-1/2+Z; #4: 1/2+X,1/2-Y,3/2-Z; #5: 1/2+X,1/2-Y,1/2-Z; #6: 2-X,1-Y,1-Z. |          |                |          |                 |          |

**Table S3. Comparison of the catalytic performance of NUC-41a catalyst with selected previously reported MOFs.**

| <b>MOF</b>                        | <b>Catalyst (mol %)</b> | <b>Temperature</b> | <b>Pressure (MPa)</b> | <b>Time</b> | <b>Yield (%)</b> | <b>Ref.</b> |
|-----------------------------------|-------------------------|--------------------|-----------------------|-------------|------------------|-------------|
| <b>MOF-205(M)</b>                 | 2.5                     | RT                 | 0.4                   | 4           | 80               | S1          |
| <b>NH<sub>2</sub>-MIL-101(Al)</b> | 0.17                    | 120                | 1.8                   | 6           | 95               | S2          |
| <b>MMCF-2</b>                     | 0.13                    | RT                 | 0.1                   | 48          | 95               | S3          |
| <b>Cr-MIL-101</b>                 | 1.2                     | RT                 | 0.8                   | 24          | 82               | S4          |
| <b>NUC-41a</b>                    | 0.2                     | 65                 | 0.1                   | 12          | 98               | This work   |

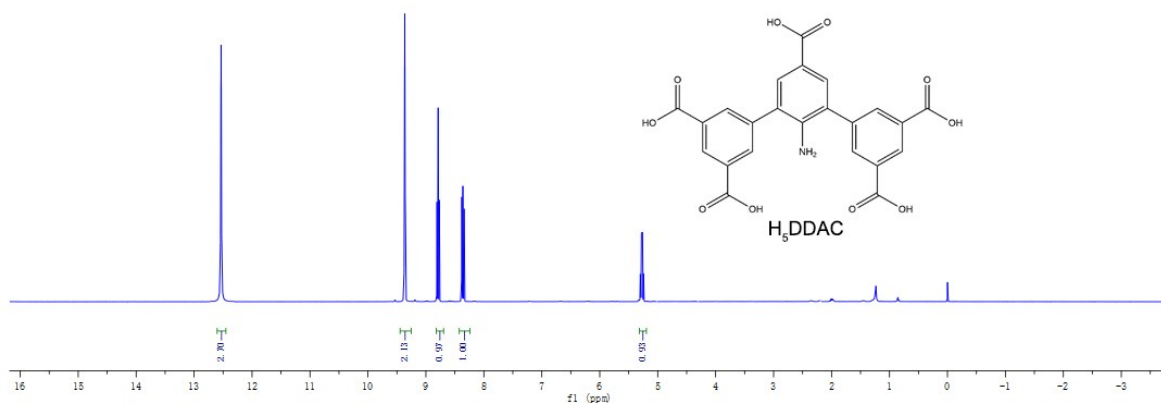

**Scheme S1. The <sup>1</sup>H NMR of designed H<sub>5</sub>DDAC ligand.**

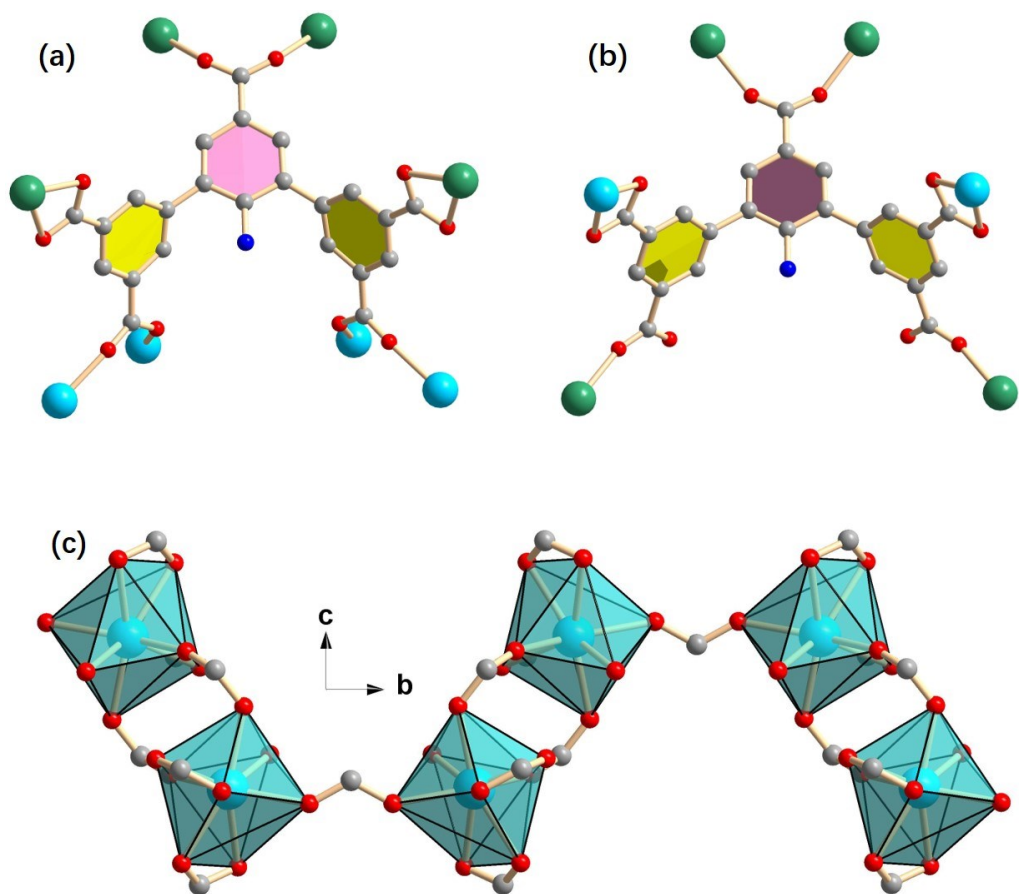

Figure S1. The coordination mode of DDAC ligand with type I (a) and type II (b); the ytterbium-hydroxide structure (b); the one-dimensional  $[\{\text{Eu}(2)_2\}(\text{HCO}_2)]_n$  chain (c).

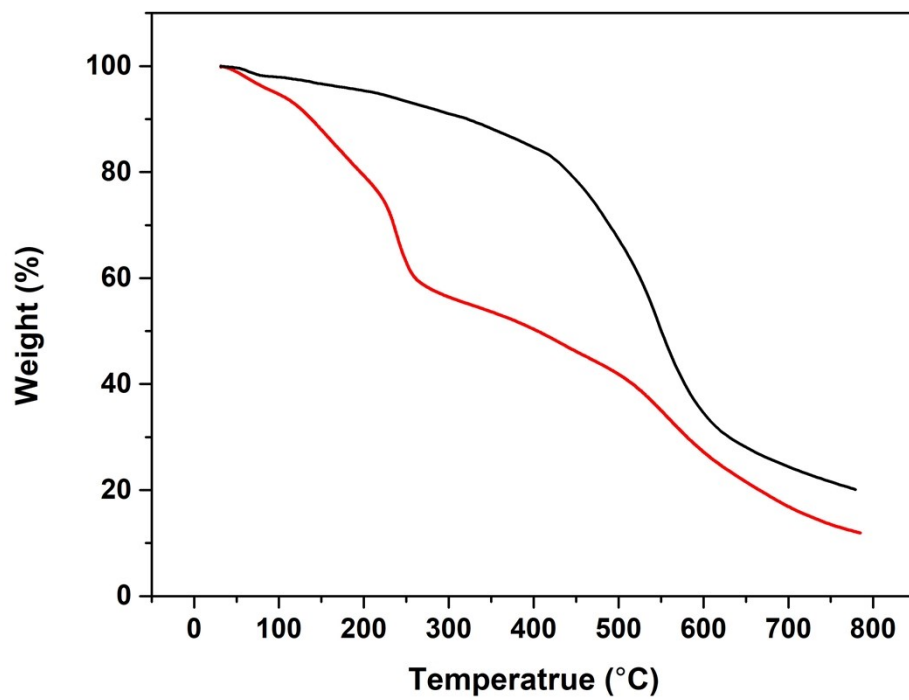

Figure S2. TGA curve of as-synthesized (black) and activated (red) sample of NUC-41.



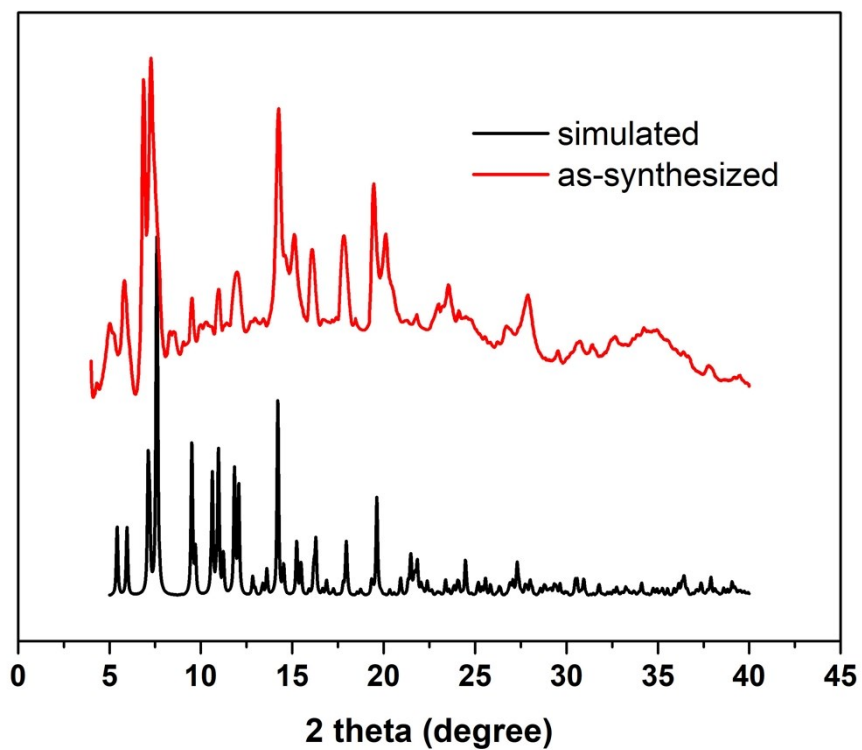

Figure S3. PXRD pattern of as-synthesized NUC-41 sample.

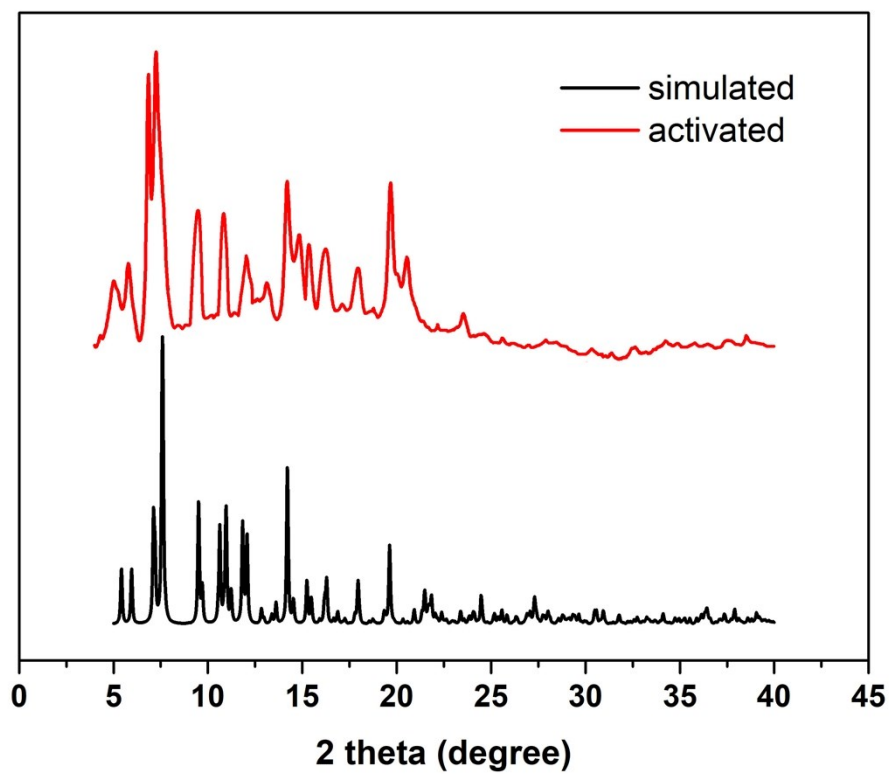

Figure S4. PXRD pattern of NUC-41 after activation.

### Isosteric Heat Calculation.

The  $Q_{st}$  value is a parameter that describes the average enthalpy of adsorption for an adsorbing gas molecule at a specific surface coverage and is usually evaluated using two or more adsorption isotherms collected at similar temperatures. The zero-coverage isosteric heat of adsorption is evaluated by first fitting the temperature-dependent isotherm data to a virial-type expression, which can be written as:

$$\ln P = \ln N + \frac{1}{T} \sum_{i=0}^m a_i N^i + \sum_{i=0}^n b_i N^i \quad (1)$$

$$Q_{st} = -R \sum_{i=0}^m a_i N^i \quad (2)$$

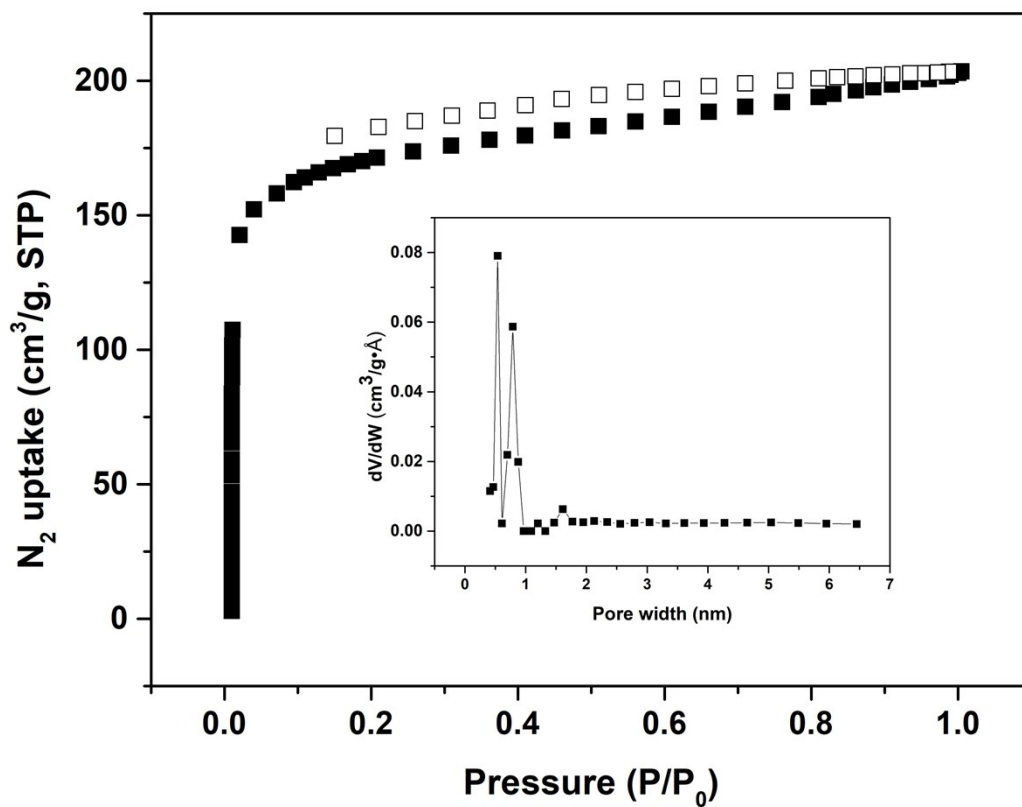

Figure S5. N<sub>2</sub> adsorption and desorption isotherms of NUC-41a at 77 K (Insert: the pore size distribution).

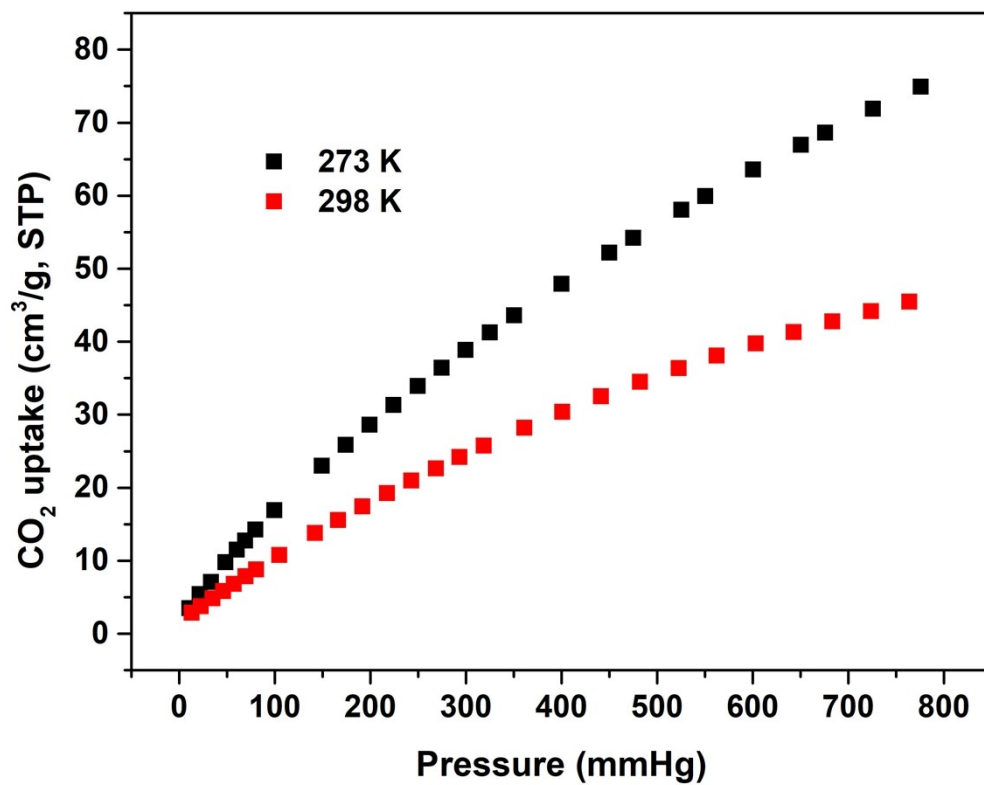

Figure S6. Adsorption isotherm of CO<sub>2</sub> at 273K and 298K.

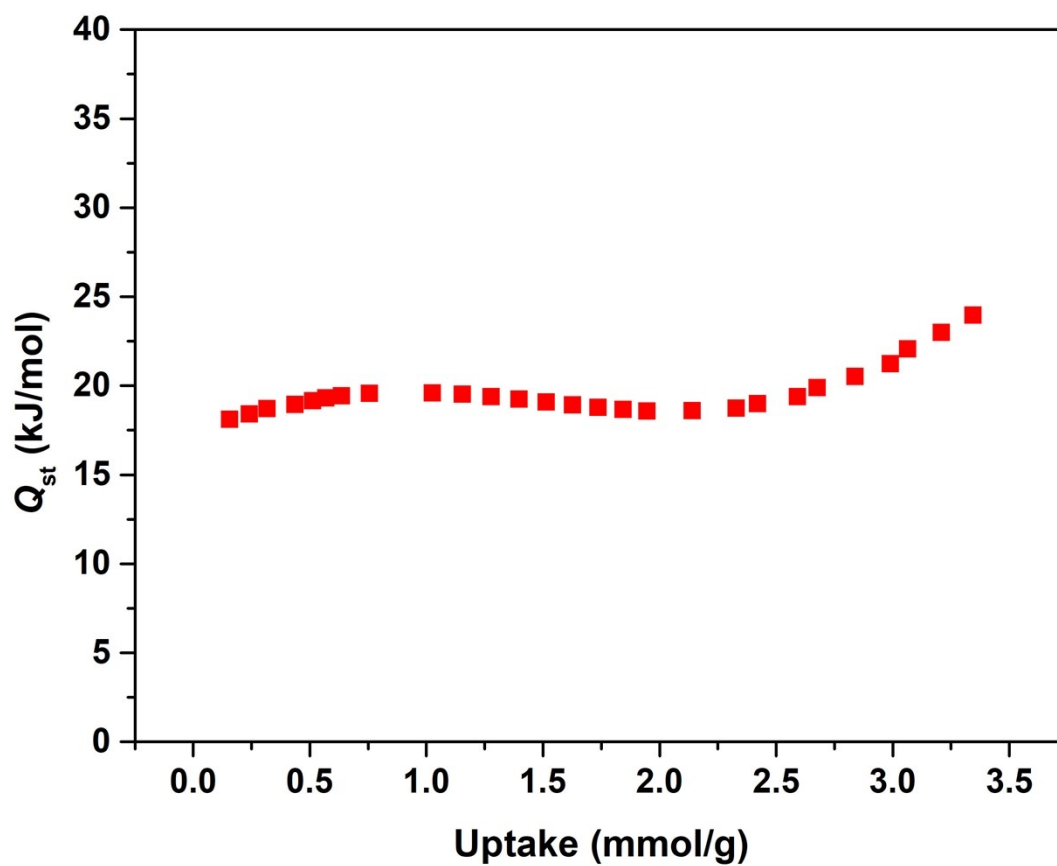

Figure S7. CO<sub>2</sub> adsorption heat calculated by the virial equation of NUC-41a.

### Yield Calculation Based on the GC-MS Analysis

Gas chromatography mass spectrometry (GC-MS) analyses were performed on a time-of-flight Thermo Fisher Trace ISQ GC/MS instrument, the yield (%) was calculated based on the consumption of starting material using the equation:

$$Yield (\%) = \left( \frac{\frac{\text{area of reactant at 0 hour}}{\text{area of internal standard at 0 hour}} - \frac{\text{area of reactant at any time}}{\text{area of internal standard at any time}}}{\frac{\text{area of reactant at 0 hour}}{\text{area of internal standard at 0 hour}}} \right) \times 100\% \quad (3)$$

5

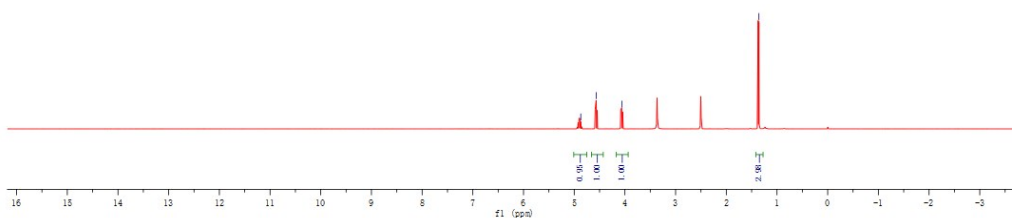

Figure S8. The  $^1\text{H}$  NMR spectrum of 4-methyl-1,3-dioxolan-2-one (Figure 3, entry 1).

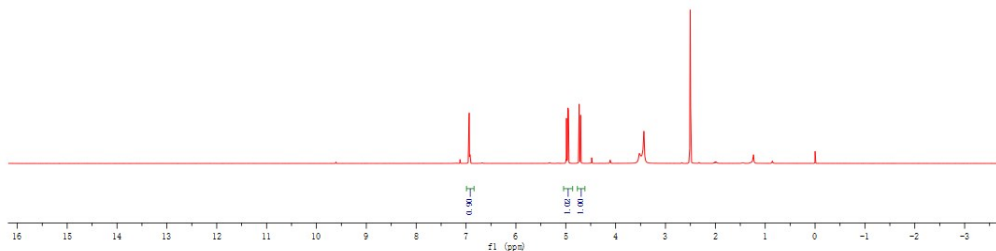

Figure S9. The  $^1\text{H}$  NMR spectrum of 4-chloro-1,3-dioxolan-2-one (Figure 3, entry 2).

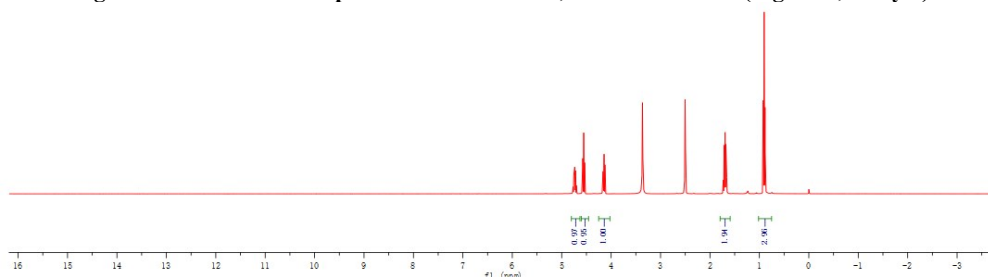

Figure S10. The  $^1\text{H}$  NMR spectrum of 4-ethyl-1,3-dioxolan-2-one (Figure 3, entry 3).

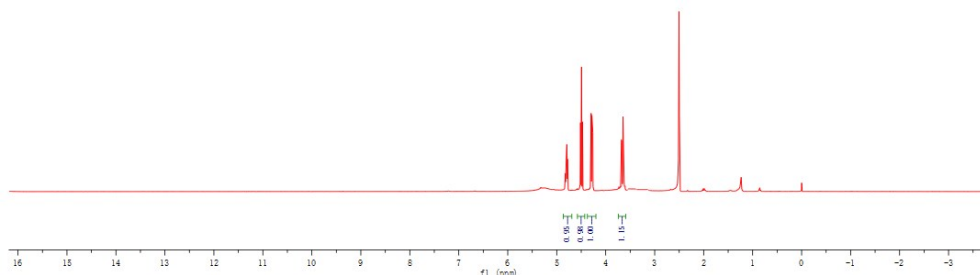

Figure S11. The  $^1\text{H}$  NMR spectrum of 4-(bromomethyl)-1,3-dioxolan-2-one (Figure 3, entry 4).

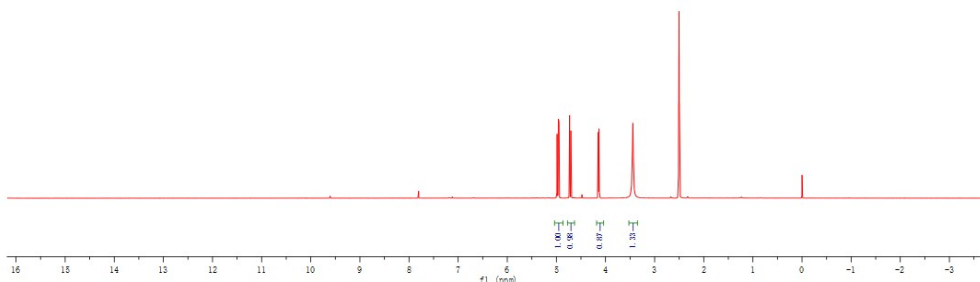

Figure S12. The  $^1\text{H}$  NMR spectrum of 4-(chloromethyl)-1,3-dioxolan-2-one (Figure 3, entry 5).

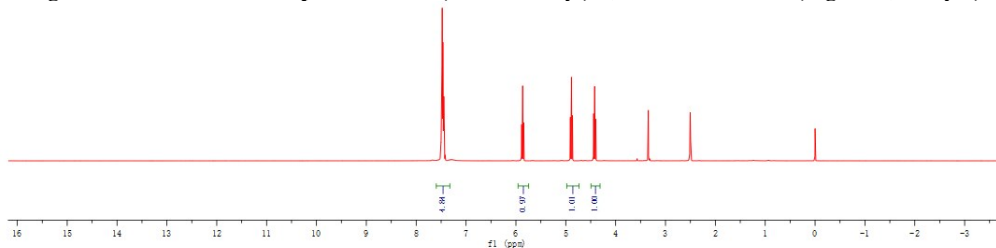

Figure S13. The  $^1\text{H}$  NMR spectrum of 4-phenyl-1,3-dioxolan-2-one (Figure 3, entry 5).





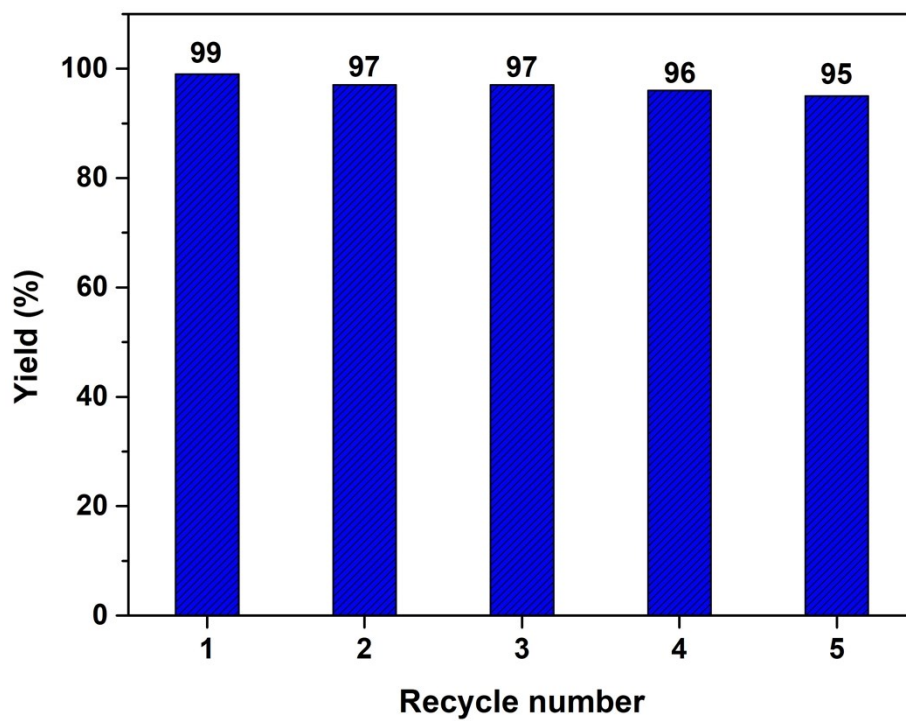

Figure S14. The recycled catalytic cycloaddition reaction.

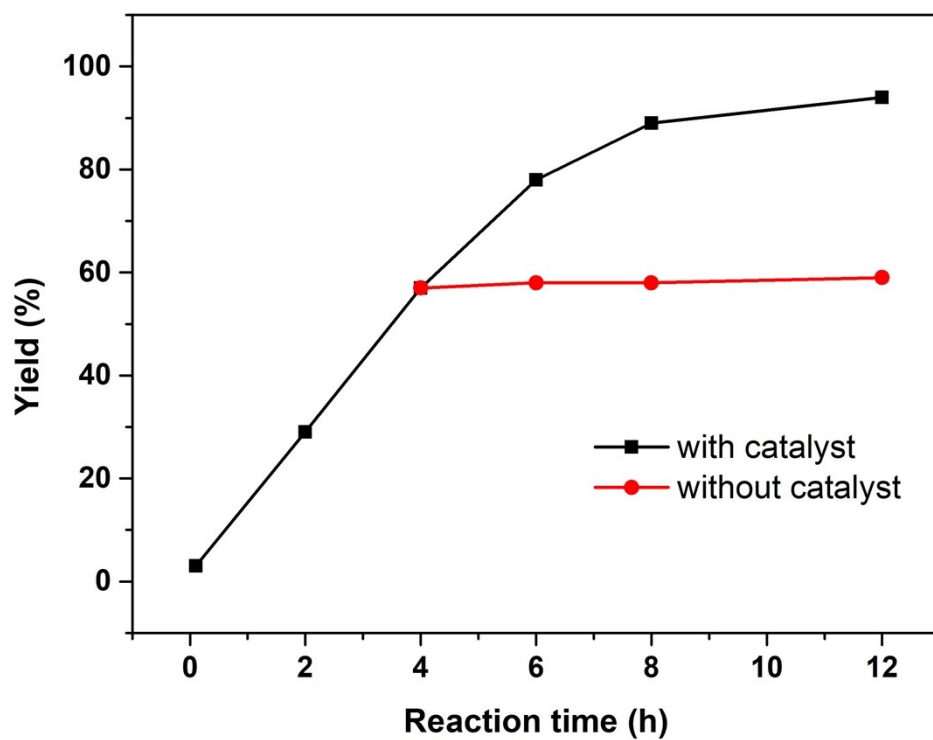

Figure S15. The hot filtration experiment of cycloaddition reaction catalysed by NUC-41a.

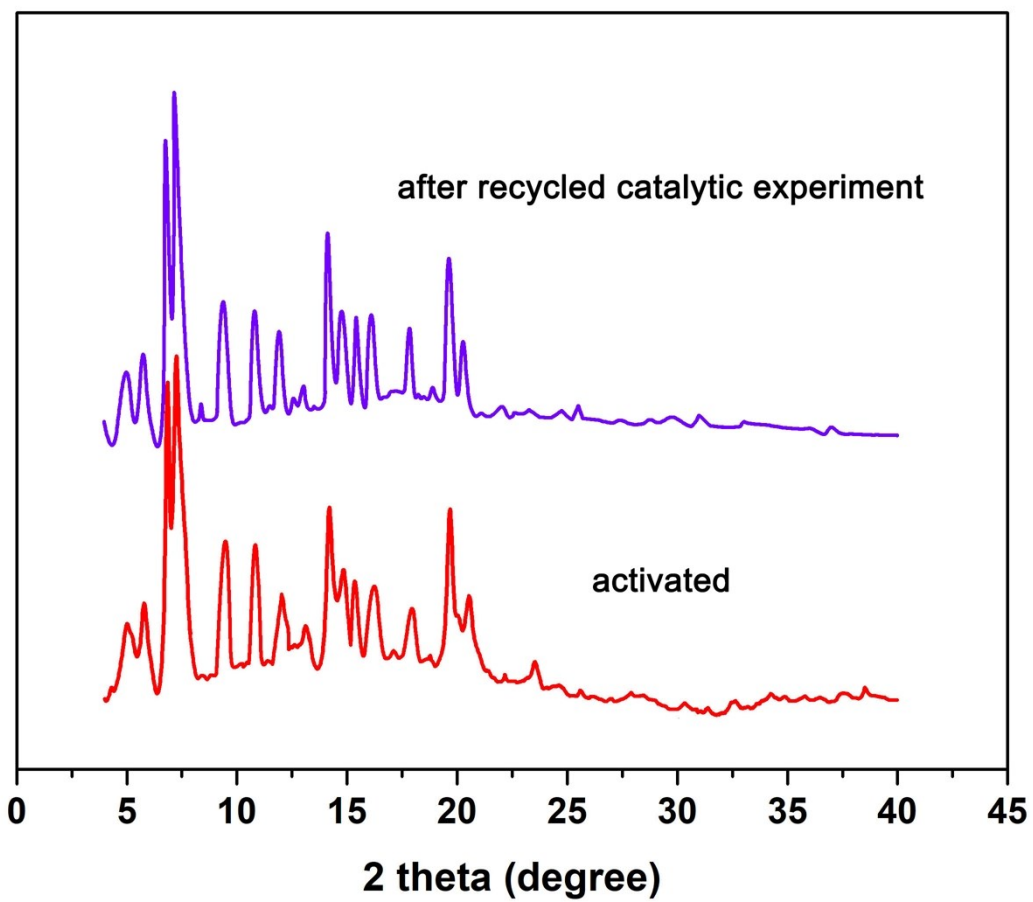

Figure S16. The PXRD pattern of NUC-41a after recycled cycloaddition reaction.

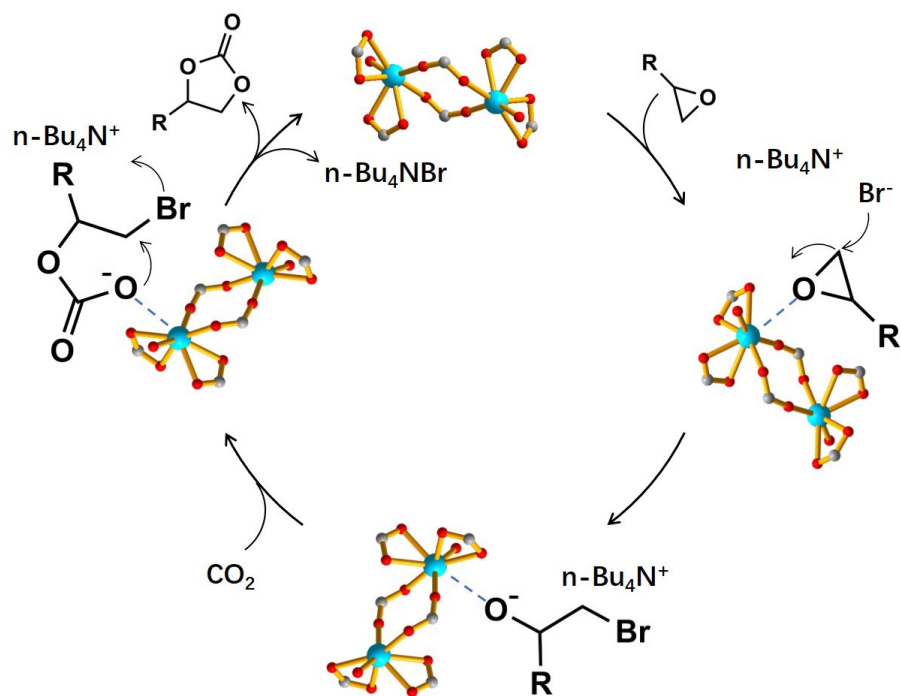

Figure S17. The proposed reaction mechanism for the chemical fixation of CO<sub>2</sub> in presence of synergistic catalysis.

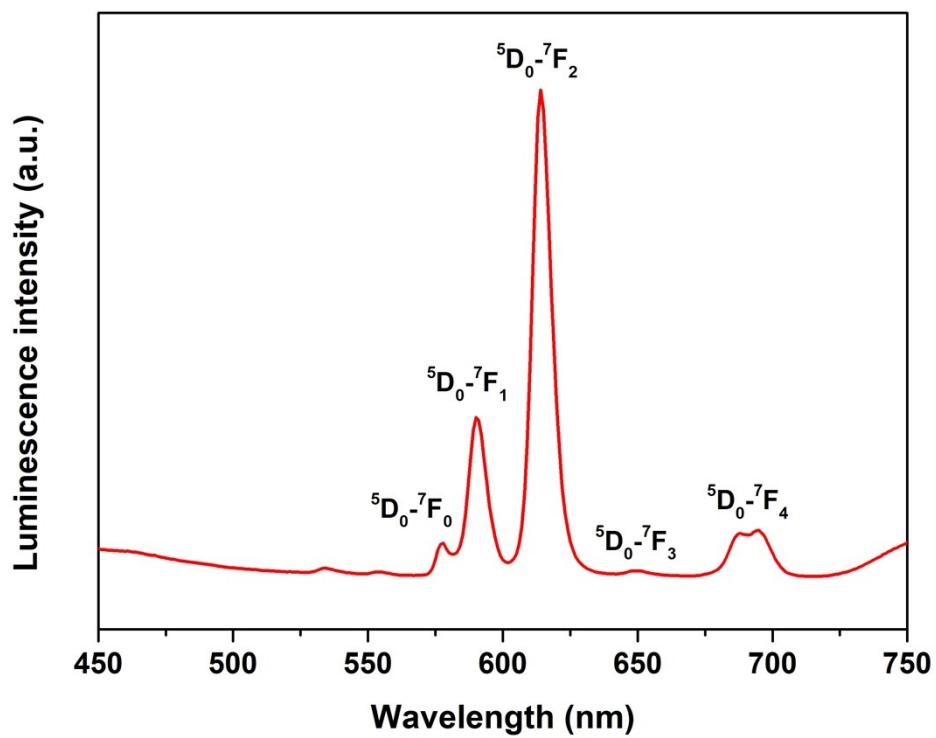

Figure S18. The luminescence spectra of NUC-41.

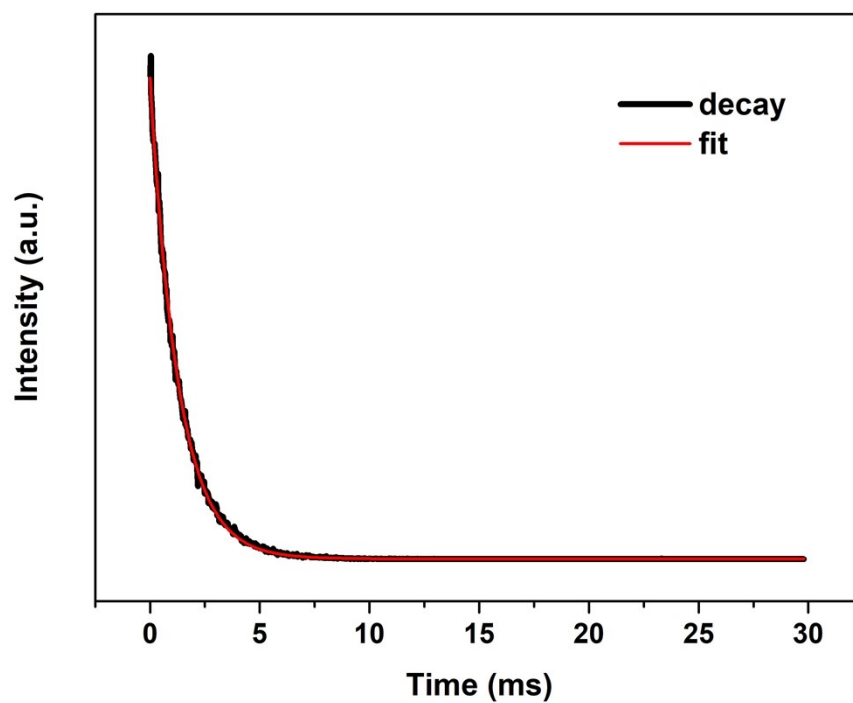

Figure S19. The luminescence lifetime of NUC-41.

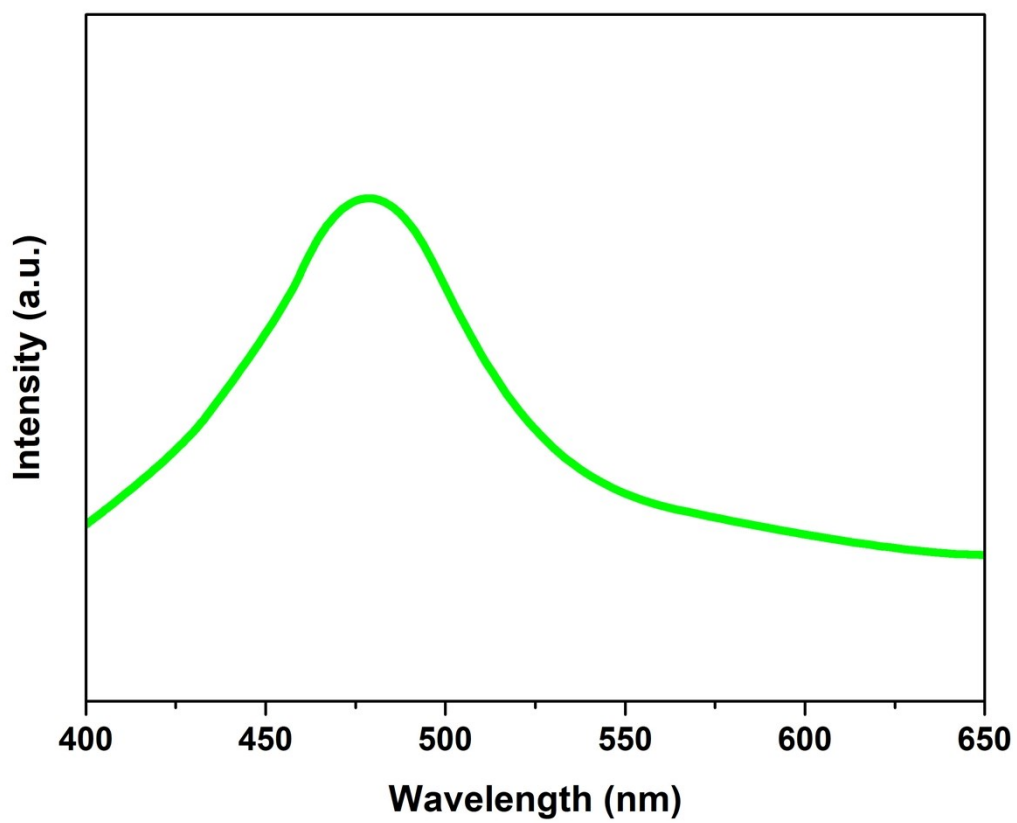

Figure S20. The phosphorescence luminescence of Gd-MOF at 77K.



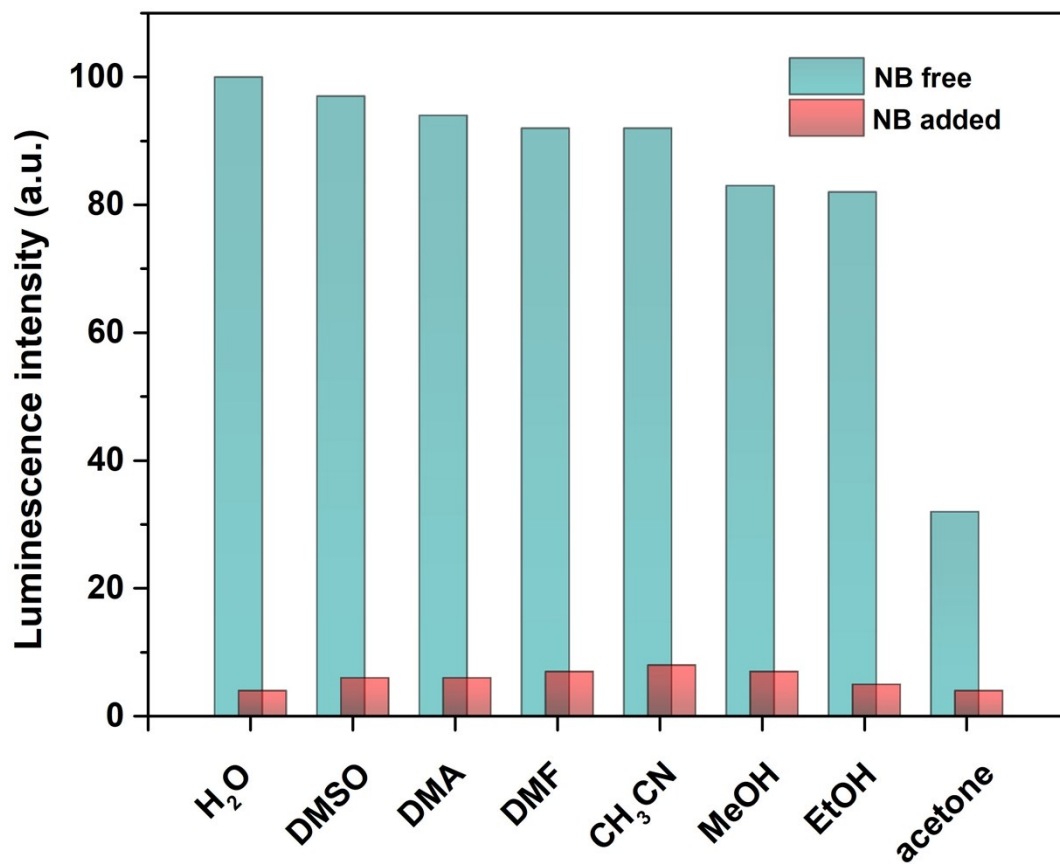

Figure S21. Nitrobenzene-added emission intensity of NUC-41 in the presence of various solvents.

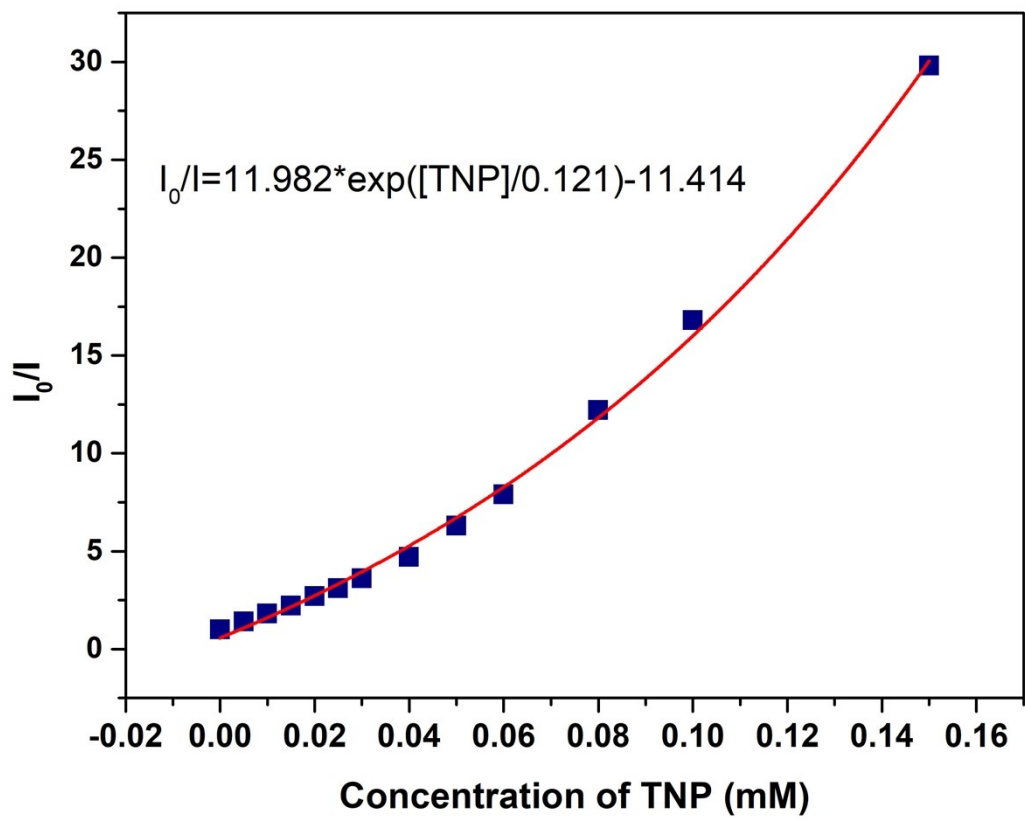

Figure S22. The plot of I<sub>0</sub>/I versus the TNP concentration from 0-0.15 mM.

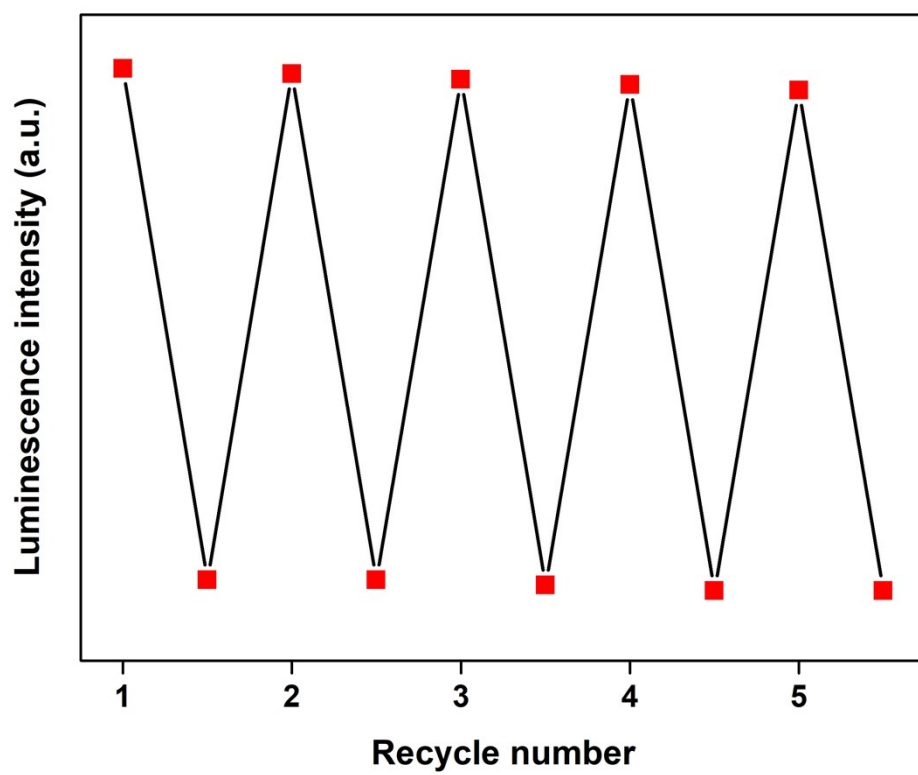

Figure S23. The recycled luminescence sensing experiment of NUC-41 toward TNP.

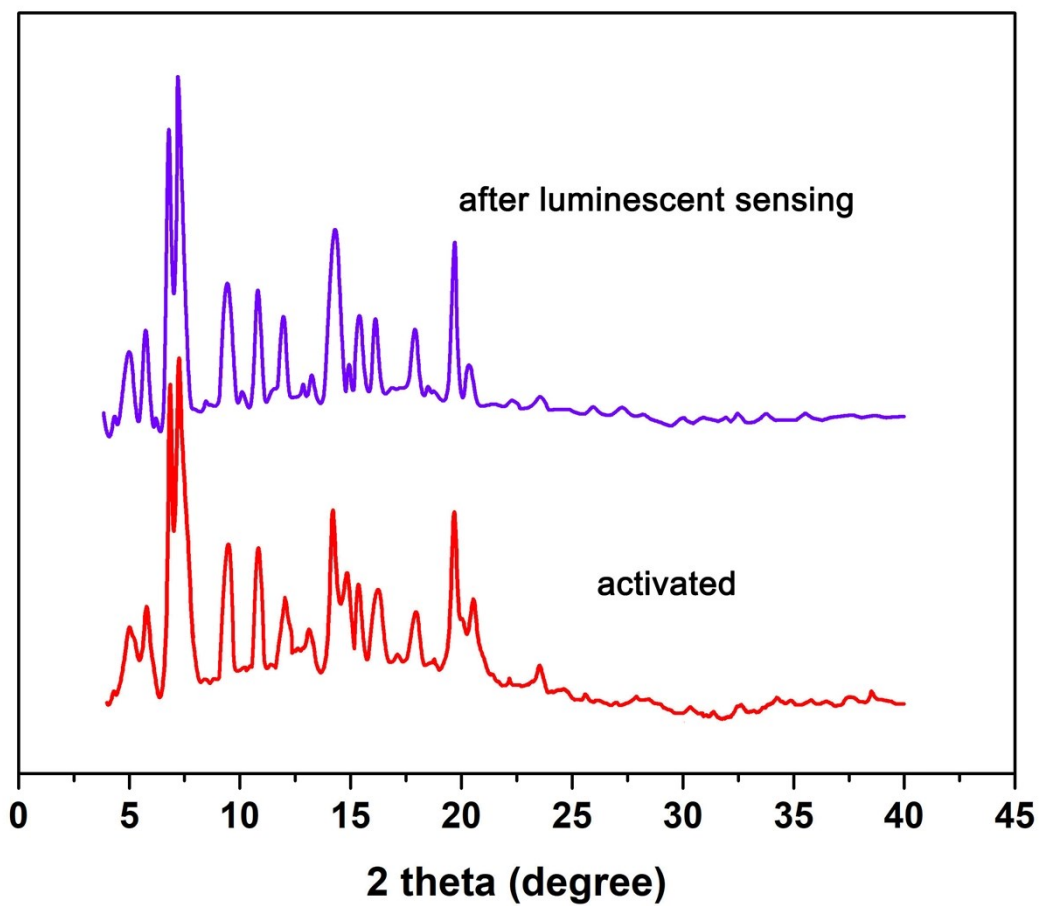

Figure S24. The PXRD pattern of NUC-41 after recycled luminescence sensing of TNP.

## Reference

- S1. Babu, R. Roshan, R.; Kathalikkattil, A. C.; Kim, D. W.; Park D.-W. Rapid, Microwave-Assisted Synthesis of Cubic, Three-Dimensional, Highly Porous MOF-205 for Room Temperature CO<sub>2</sub> Fixation via Cyclic Carbonate Synthesis. *ACS Appl. Mater. Interfaces* **2016**, *8*, 33723–33731.
- S2. Senthilkumar, S.; Maru, M. S.; Somani, R. S.; Bajaj, H. C.; Neogi, S. Unprecedented NH<sub>2</sub>-MIL-101(Al)/n-Bu<sub>4</sub>NBr System as Solvent-Free Heterogeneous Catalyst for Efficient Synthesis of Cyclic Carbonates via CO<sub>2</sub> Cycloaddition. *Dalton Trans.* **2018**, *47*, 418–428.
- S3. Gao, W. Y.; Chen, Y.; Niu, Y. H.; Williams, K.; Cash, L.; Perez, P. J.; Wojtas, L.; Cai, J. F.; Ma, S. Q. Crystal Engineering of an nbo Topology Metal-Organic Framework for Chemical Fixation of CO<sub>2</sub> under Ambient Conditions. *Angew. Chem., Int. Ed.* **2014**, *53*, 2615–2619.
- S4. Zalomaeva, O. V.; Chibiryaev, A. M.; Kovalenko, K. A.; Kholdeeva, O. A.; Balzhinimaev, B. S.; Fedin, V. P. Cyclic Carbonates Synthesis from Epoxides and CO<sub>2</sub> Over Metal-organic Framework Cr-MIL-101. *J. Catal.* **2013**, *298*, 179–185.
